# Supplementary material
Source: publisher site journal article supplement (https://www.spandidos-publications.com/4427/downloadSupplementary)

Figure S1. Correlations between LIMK1 expression and MDSCs. (A) Correlations between LIMK1 expression and immune cells in pan-cancer panel. (B-C) Correlations between LIMK1 expression and MDSCs in (B) COAD ( $r=0.104$ ,  $P=2.58 \times 10^{-2}$ ) and (C) READ ( $r=0.167$ ,  $P=3.1 \times 10^{-2}$ ). LIMK1, LIM domain kinase 1; MDSCs, myeloid-derived suppressor cells; COAD, colon adenocarcinoma; READ, rectum adenocarcinoma.

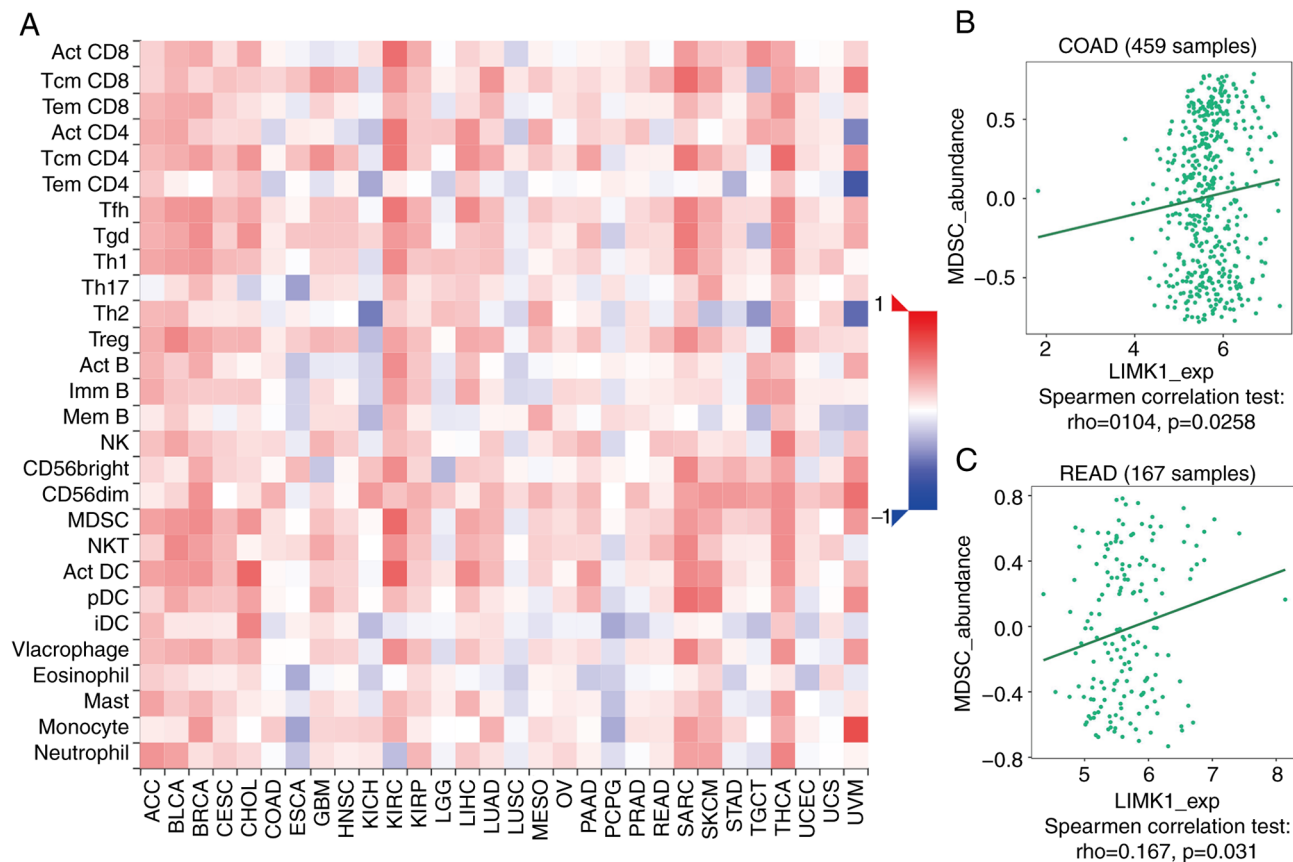

Supplement: Supplementary file 1 [file downloadSupplementary]
